# Supplementary material
Source: Springer Nature journal article supplement (https://www.springermedizin.de/resource/supplementary/13023_2014_769_MOESM2_ESM.pdf/9643040)

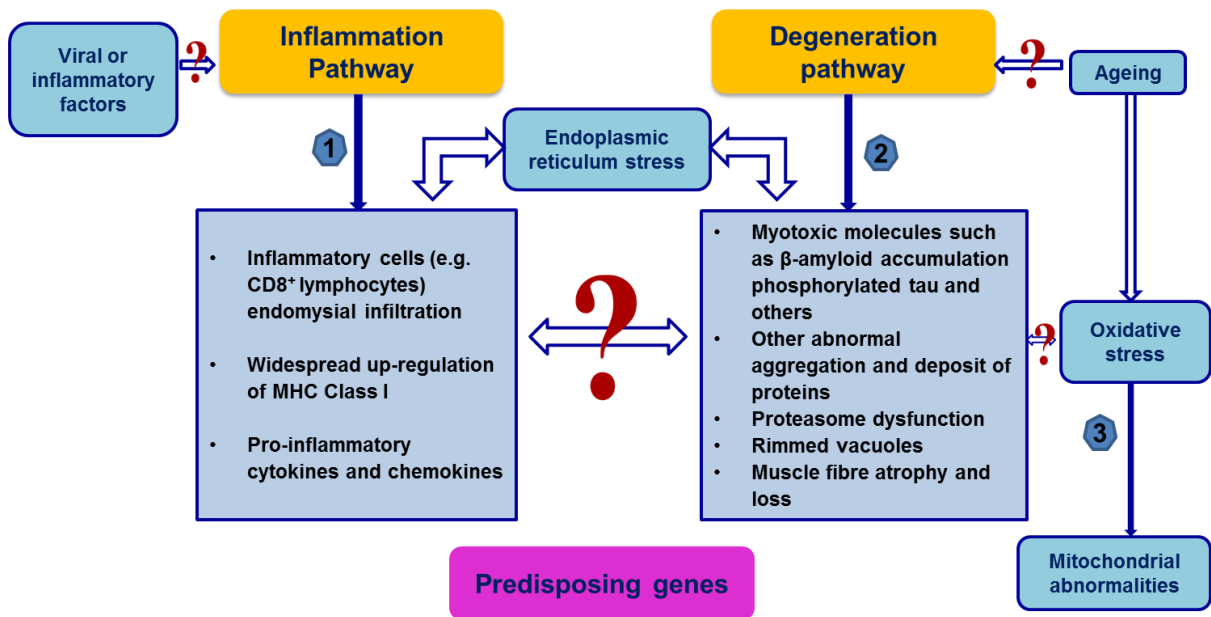

Figure 2

Supplement: MOESM2 [file 9643040]
